# Supplementary material for: Matrix effect of five kinds of meat on colloidal gold immunochromatographic assay for sulfamethazine detection
Source: Royal Society of Chemistry journal article supplement (doi:10.1039/c8ay01322e), 2018-01-01
Supplement: c8ay01322e1.pdf [file c8ay01322e1.pdf]

## Supporting information

### Matrix Effect of Five Kinds of Meat on Colloidal Gold

#### Immunochromatographic Assay for Sulfamethazine Detection

Namei Liu<sup>a,1</sup>, Keyu Xing<sup>a,1</sup>, Chun Wang<sup>a</sup>, Ganggang Zhang<sup>a</sup>, Meifang Yuan<sup>a</sup>,  
Danhong Li<sup>b</sup>, Weihua Lai<sup>a,\*</sup>, Juan Peng<sup>b,\*</sup>

<sup>a</sup> State Key Laboratory of Food Science and Technology, Nanchang University,  
Nanchang 330047, China

<sup>b</sup> School of Food, Nanchang University, Nanchang 330047, China

<sup>1</sup> These authors contributed equally to the work.

\* Corresponding authors: Weihua Lai (talktolaiwh@163.com) and Juan Peng  
(pengjuan2016@163.com), Tel.: +86 13879178802, fax: +86 791 88333708.

38

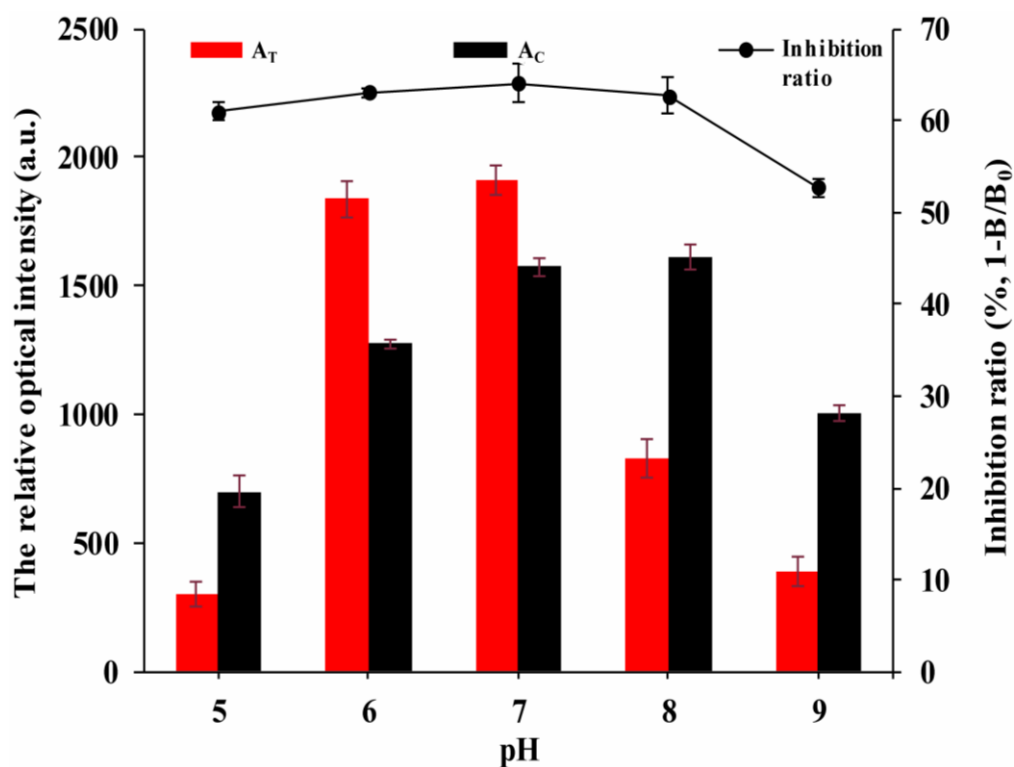

39

40 **Fig. S1.** Optimization of coupling pH between CG nanoparticles probe and anti-SM<sub>2</sub>  
 41 mAb. The competitive inhibition ratio was obtained by  $1-B/B_0$ .  $B_0$  and  $B$  of all  
 42 optimizations represented  $A_T/A_C$  of the negative sample and the positive sample (0.3  
 43 ng/mL), respectively. Data were obtained from three replicates.

44

45

46

47

48

49

50

51

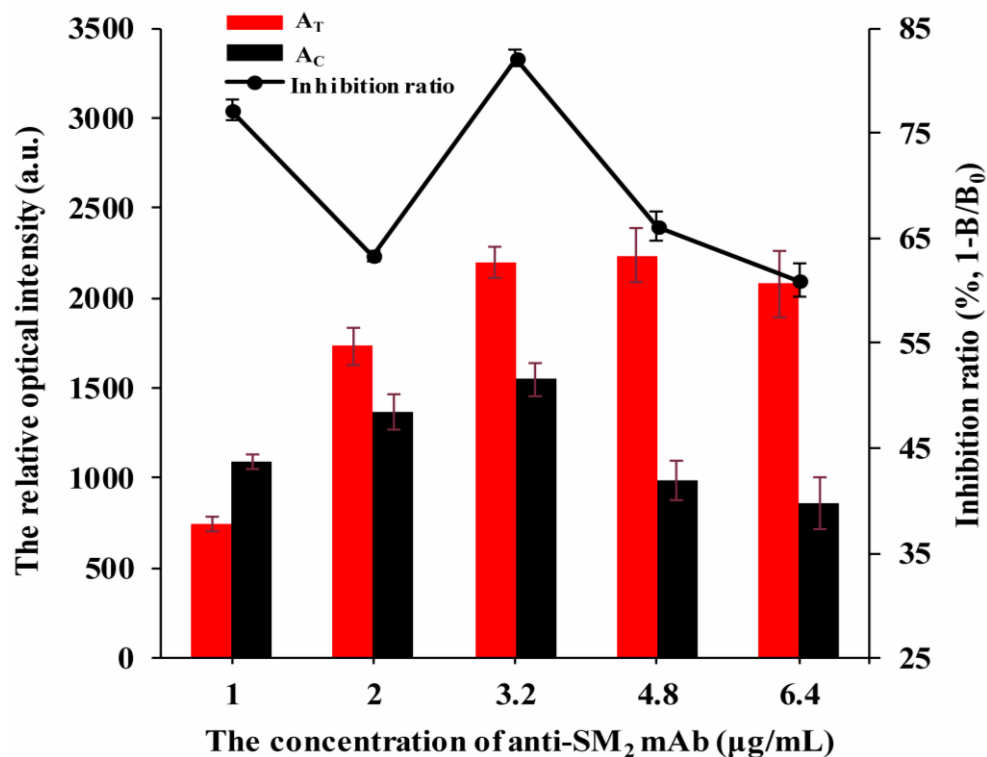

**Fig. S2.** Optimization of the anti-SM<sub>2</sub> mAb concentration. The competitive inhibition ratio was obtained using the following equation:  $1-B/B_0$ .  $B_0$  and  $B$  of all optimizations represented  $A_T/A_C$  of the negative sample and the positive sample (0.3 ng/mL), respectively. Data were obtained from three replicates.

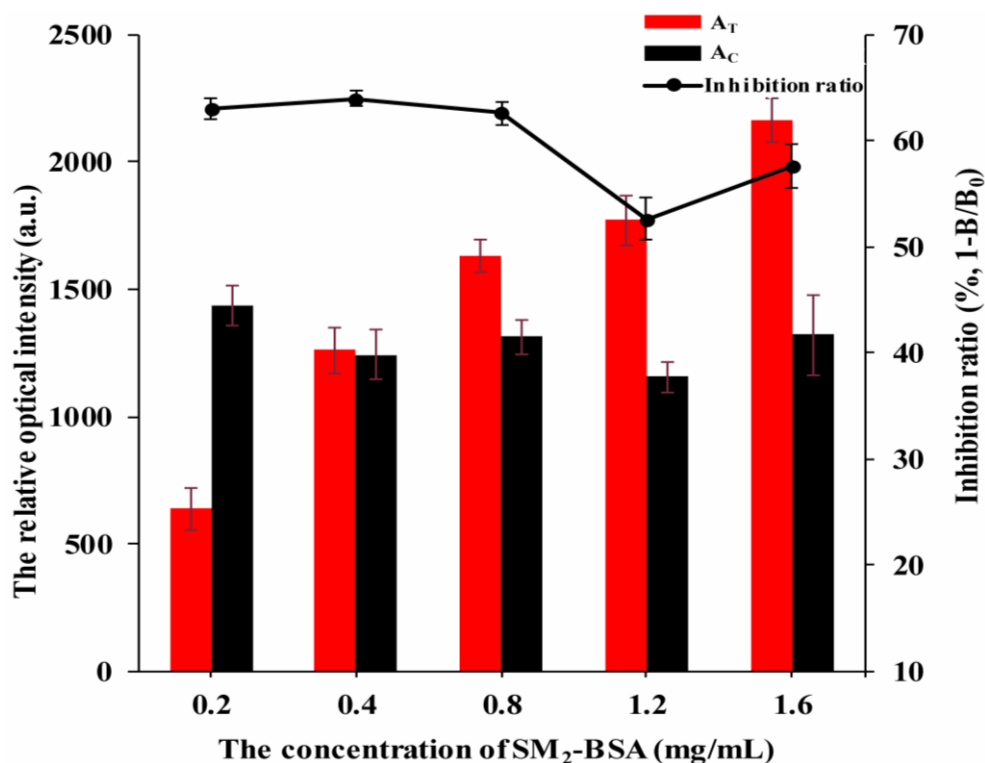

69

70 **Figs. S3.** Optimization of the SM<sub>2</sub>-BSA concentration on the T line on the test line of  
 71 CG-ICA. The competitive inhibition ratio was obtained using the following equation:  
 72  $1-B/B_0$ . B<sub>0</sub> and B of all optimizations represented A<sub>T</sub>/A<sub>C</sub> of the negative sample and  
 73 the positive sample (0.3 ng/mL). Data were obtained from three replicates.

74

75

76

77

78

79

80

81

82

83

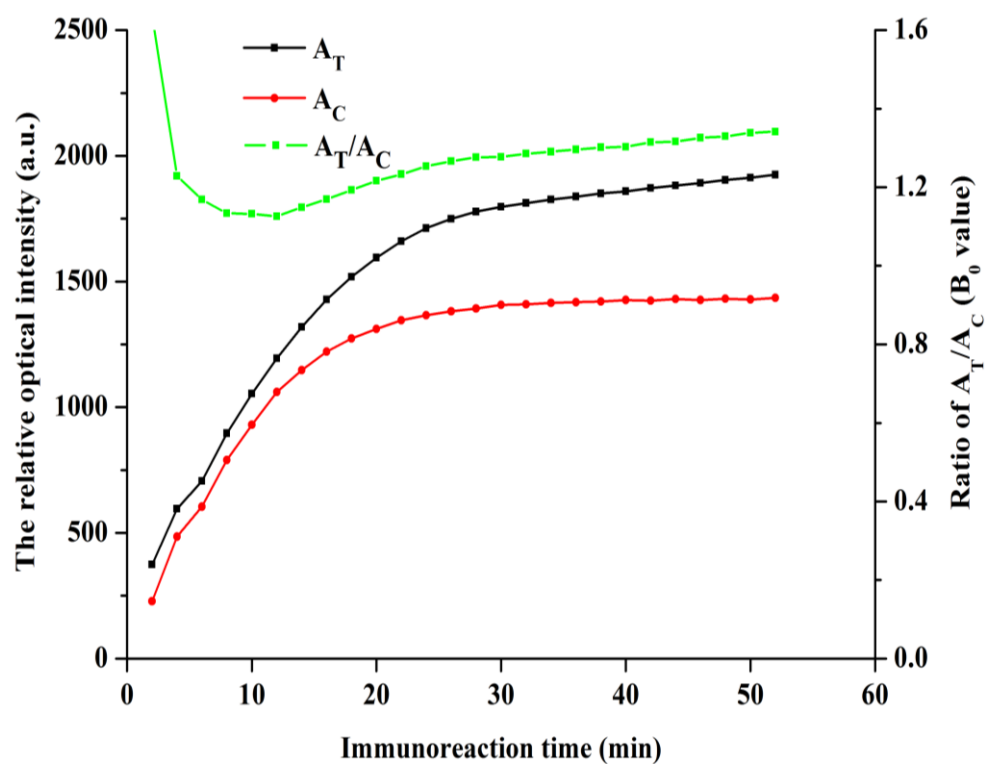

84

85 **Fig. S4.** Immunoreaction dynamics of the CG-ICA without SM<sub>2</sub>.

86
